# Supplementary material
Source: MDPI journal article supplement (https://www.mdpi.com/2072-4292/14/20/5101)
Supplement: s1 [file s1]

# Supplementary Materials for “Using Tracking Data to Identify Gaps in Knowledge and Conservation of the Critically Endangered Siberian Crane (*Leucogeranus leucogeranus*)”

October, 2022

## Overview

These Supplementary Materials accompany our paper, Using Tracking Data to Identify Gaps in Knowledge and Conservation of the Critically Endangered Siberian Crane (*Leucogeranus leucogeranus*). Below we list additional relevant appendices, figures, and tables that help to explain the data, methods applied, movement trajectory traits, bird individual information, migration parameters, and critical stopover sites presented in the part of the analyses:

- **Figures:**

- ✧ **Figure S1.** Movement trajectory traits of the Siberian crane in the breeding ground (A), summering ground (B), stopover sites(C), and wintering ground(D) based on Ornitela 10-minute tracking data combined from two individuals (SC1901 and SC1902).

- **Tables:**

- ✧ **Table S1** Summary information relating to four Siberian cranes (*Leucogeranus leucogeranus*) (undetermined sex) fitted with telemetry loggers in 2015, 2016, and 2019 to record positions (accurate to 2 m based on static field trials) at regular intervals (with a time and date stamp) and download these data via the GSM telephone network when within coverage. The five cranes of the 1990s were tracked through Argos System, which are the same as those in Kanai et al. (2002).
- ✧ **Table S2.** Migration parameters of nine Siberian cranes (*Leucogeranus leucogeranus*) on twelve spring/autumn migration trips.
- ✧ **Table S3.** The list of 17 critical stopover sites classified by birds staging for more than 14 days.
- ✧ **Table S4.** List of 18 stopover sites classified by birds staging for more than two days.
- ✧ **Table S5.** Extent of tagged cranes used areas and conservation status

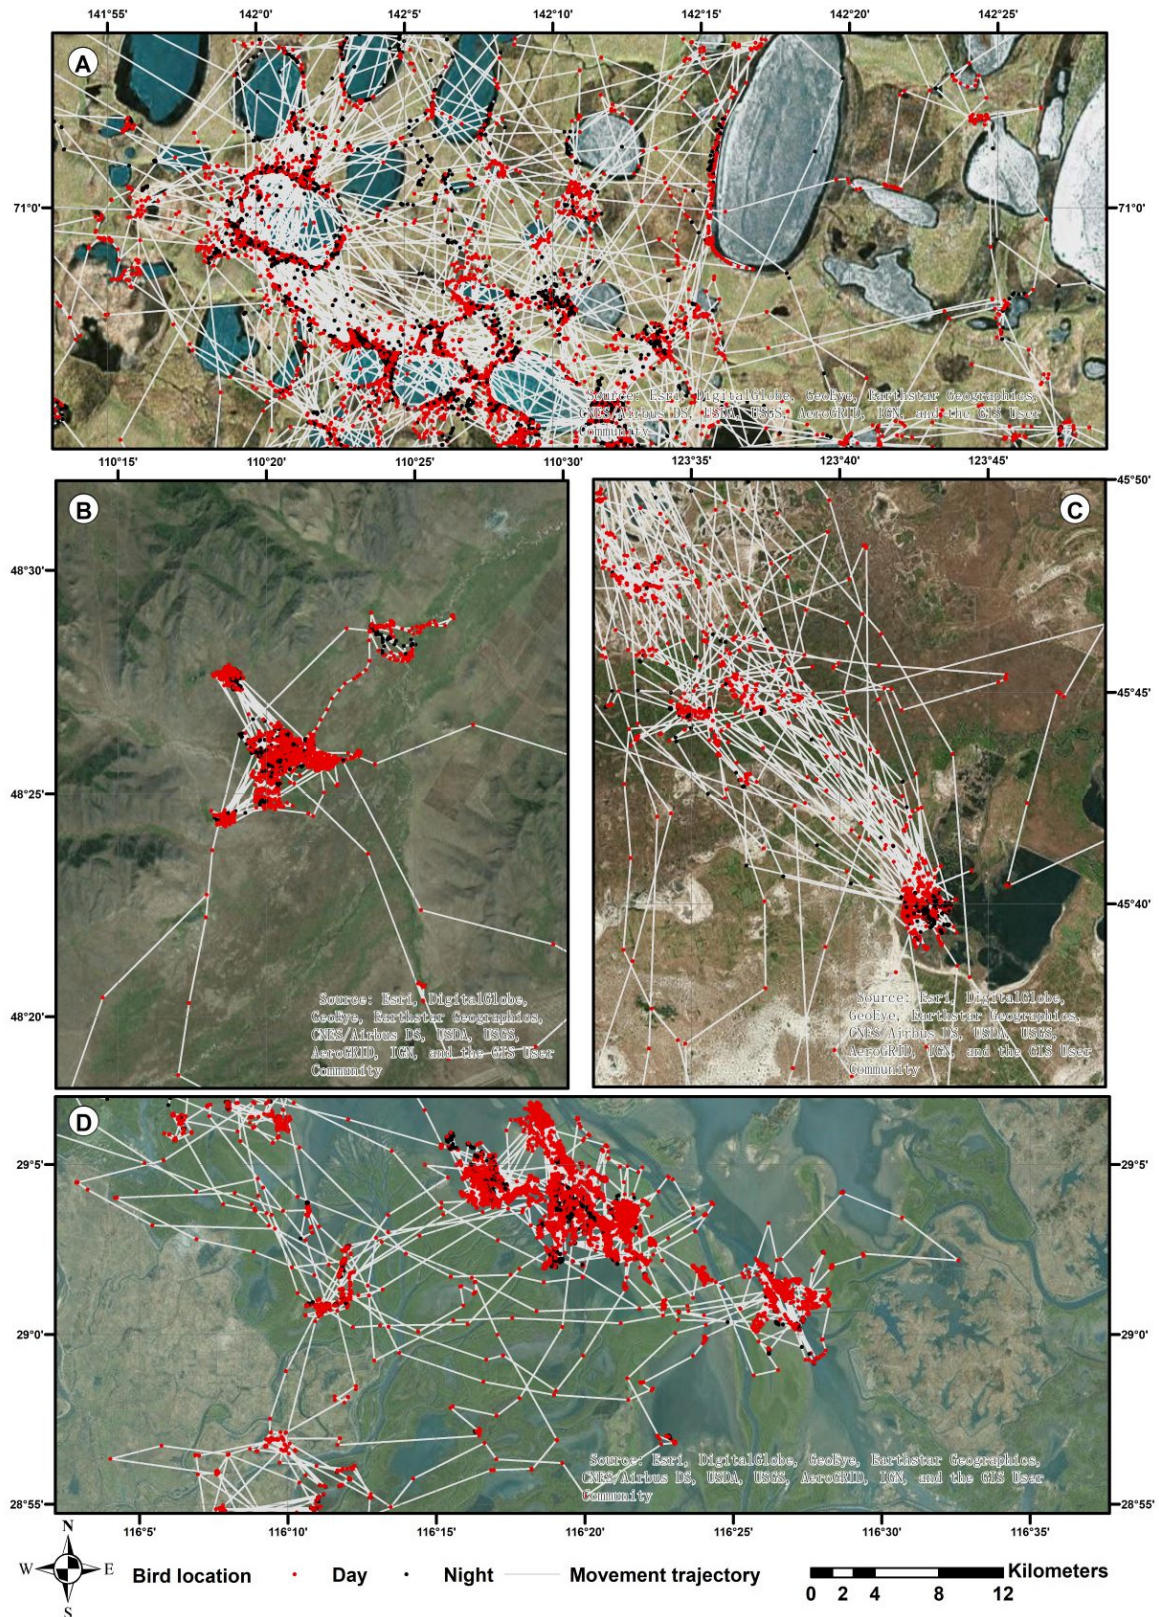

**Supplementary Materials Figure S1.** Movement trajectory traits of the Siberian crane in the breeding ground (A), summering ground (B), stopover sites(C), and wintering ground(D) based on Ornitela 10-minute tracking data combined from two individuals (SC1901 and SC1902).

**Supplementary Materials Table S1.** Summary information relating to four Siberian cranes (*Leucogeranus leucogeranus*) (undetermined sex) fitted with telemetry loggers in 2015, 2016, and 2019 to record positions (accurate to 2 m based on static field trials) at regular intervals (with a time and date stamp) and download these data via the GSM telephone network when within coverage. The five cranes of the 1990s were tracked through Argos System, which are the same as those in Kanai et al. (2002).

| Bird ID | Capture date | Capture site |           | Company/<br>Country    | Satellite system | Location accuracy | Temporal resolution    | Total number of locations | Number of days generating data | Age at capture | Cut-off date | Ratio of Logger and bird body mass |
|---------|--------------|--------------|-----------|------------------------|------------------|-------------------|------------------------|---------------------------|--------------------------------|----------------|--------------|------------------------------------|
|         |              | Latitude     | Longitude |                        |                  |                   |                        |                           |                                |                |              |                                    |
| SC1901  | 2019-06-15   | 48.378       | 110.299   | Ornitela/<br>Lithuania | GPS              | 2m                | 144 locations per day  | 75,392                    | 607                            | Adult          | 2021-02-10   | 0.57%                              |
| SC1902  | 2019-06-05   | 48.297       | 110.353   | Ornitela/<br>Lithuania | GPS              | 2m                | 144 locations per day  | 124,390                   | 951                            | Subadult       | 2021-12-11   | 0.57%                              |
| SC1603  | 2016-07-19   | 49.166       | 112.737   | Koeco/<br>Korea        | GPS              | 2m                | 12 locations per day   | 3479                      | 288                            | Adult          | 2017-05-02   | 0.92%                              |
| SC1504  | 2015-07-22   | 48.298       | 110.353   | North Star/<br>USA     | GPS              | 2m                | ~1.5 locations per day | 1107                      | 713                            | Subadult       | 2016-12-20   | 0.39%                              |
| SC9605  | 1996-07-25   | 71.126       | 148.467   | NTT/<br>Japan          | ARGOS            | 150 m             | ~2.5 locations per day | 295                       | 117                            | adult          | 1996-11-18   | <2%                                |
| SC9606  | 1996-07-24   | 71.017       | 148.181   | NTT/<br>Japan          | ARGOS            | 150 m             | ~2.3 locations per day | 385                       | 166                            | adult          | 1997-01-05   | <2%                                |
| SC9607  | 1996-07-21   | 70.910       | 147.916   | NTT/<br>Japan          | ARGOS            | 150 m             | ~0.9 locations per day | 118                       | 136                            | adult          | 1996-12-03   | <2%                                |
| SC9508  | 1995-08-07   | 71.089       | 146.446   | NTT/<br>Japan          | ARGOS            | 150 m             | ~1.9 locations per day | 290                       | 149                            | adult          | 1996-01-02   | <2%                                |
| SC9509  | 1995-08-04   | 71.088       | 148.304   | NTT/<br>Japan          | ARGOS            | 150 m             | ~2.4 locations per day | 368                       | 156                            | adult          | 1996-01-06   | <2%                                |

**Supplementary Materials Table S2.** Migration parameters of nine Siberian cranes (*Leucogeranus leucogeranus*) on 17 spring/autumn migration trips.

| Migration strategy*       | Bird ID-Year-season | Departure Date | Arrival Date | Migration Duration (day) | Stopover Duration (day) | Travel Duration (day) | Migration distance (Km) | Migration Speed (km/day) | Travel speed (km/day) | Step length (km) | Number of Stopovers | Straightness index |
|---------------------------|---------------------|----------------|--------------|--------------------------|-------------------------|-----------------------|-------------------------|--------------------------|-----------------------|------------------|---------------------|--------------------|
| <b>Short autumn (N=4)</b> | SC1901_2019_autumn  | 2019-10-03     | 2019-11-19   | 47                       | 38                      | 9                     | 3352                    | 72                       | 376                   | 1676             | 1                   | 0.65               |
|                           | SC1902_2019_autumn  | 2019-09-09     | 2019-11-05   | 57                       | 49                      | 8                     | 3502                    | 62                       | 448                   | 1751             | 1                   | 0.63               |
|                           | SC1603_2016_autumn  | 2016-09-06     | 2016-10-29   | 53                       | 44                      | 9                     | 3274                    | 61                       | 357                   | 1091             | 2                   | 0.684              |
|                           | SC1504_2015_autumn  | 2015-09-08     | 2015-10-29   | 51                       | 43                      | 8                     | 3164                    | 62                       | 382                   | 1582             | 1                   | 0.668              |
| <b>Long spring (N=4)</b>  | SC1901_2020_spring  | 2020-03-15     | 2020-5-20    | 66                       | 49                      | 17                    | 5890                    | 89                       | 342                   | 2945             | 1                   | 0.84               |
|                           | SC1902_2020_spring  | 2020-04-04     | 2020-5-19    | 45                       | 35                      | 10                    | 5820                    | 128                      | 564                   | 1455             | 3                   | 0.84               |
|                           | SC1902_2021_spring  | 2021-04-16     | 2021-5-16    | 30                       | 19                      | 12                    | 5619                    | 186                      | 487                   | 2810             | 1                   | 0.88               |
|                           | SC1504_2016_spring  | 2016-04-12     | 2016-05-20   | 38                       | 23                      | 15                    | 5089                    | 133                      | 329                   | 1696             | 2                   | 0.955              |
| <b>Long autumn (N=9)</b>  | SC1901_2020_autumn  | 2020-10-01     | 2020-11-23   | 53                       | 37                      | 16                    | 5812                    | 109                      | 362                   | 1453             | 3                   | 0.81               |
|                           | SC1902_2020_autumn  | 2020-09-19     | 2020-11-07   | 49                       | 42                      | 7                     | 4391                    | 90                       | 636                   | 732              | 5                   | 0.88               |
|                           | SC1902_2021_autumn  | 2021-09-23     | 2021-11-02   | 40                       | 29                      | 12                    | 5759                    | 142                      | 484                   | 1440             | 4                   | 0.85               |
|                           | SC1504_2016_autumn  | 2016-09-20     | 2016-11-15   | 56                       | 12                      | 45                    | 4986                    | 88                       | 111                   | 2493             | 1                   | 0.996              |
|                           | SC9605_1996_autumn  | 1996-09-17     | 1996-11-10   | 54                       | 32                      | 22                    | 5202                    | 96                       | 237                   | 1734             | 2                   | 0.976              |
|                           | SC9606_1996_autumn  | 1996-09-17     | 1996-11-19   | 63                       | 31                      | 32                    | 5433                    | 86                       | 169                   | 1811             | 2                   | 0.931              |
|                           | SC9607_1996_autumn  | 1996-09-15     | 1996-11-16   | 62                       | 15                      | 47                    | 4925                    | 79                       | 105                   | 2463             | 1                   | 0.965              |
|                           | SC9508_1995_autumn  | 1995-10-03     | 1995-11-14   | 41                       | 26                      | 16                    | 5270                    | 128                      | 335                   | 1757             | 2                   | 0.956              |
|                           | SC9509_1995_autumn  | 1995-09-30     | 1995-11-11   | 42                       | 20                      | 22                    | 5607                    | 134                      | 252                   | 2803             | 1                   | 0.904              |

\*Migration strategy: Long journey between the arctic region and the Yangtze river; Short journey between Mongolia and the Yangtze river.

**Supplementary Materials Table S3.** List of 17 critical stopover sites classified by birds staging for more than 14 days.

| BIRD_ID | Year | Season | Time1      | Time2      | Lon1      | Lat1     | Lon2      | Lat2     | Duration(Day) |
|---------|------|--------|------------|------------|-----------|----------|-----------|----------|---------------|
| SC1902  | 2019 | autumn | 2019-9-12  | 2019-10-31 | 123.71154 | 45.66360 | 123.73969 | 45.63793 | 49            |
| SC1901  | 2020 | spring | 2020-3-22  | 2020-5-10  | 123.23280 | 42.69462 | 123.21587 | 42.69556 | 49            |
| SC1504  | 2015 | autumn | 2015-9-10  | 2015-10-23 | 123.31290 | 45.99570 | 123.53960 | 45.88280 | 43            |
| SC1603  | 2016 | autumn | 2016-9-13  | 2016-10-22 | 123.53097 | 45.88017 | 123.53912 | 45.88208 | 40            |
| SC1901  | 2019 | autumn | 2019-10-8  | 2019-11-15 | 123.23134 | 42.69068 | 123.22935 | 42.69004 | 38            |
| SC1902  | 2020 | spring | 2020-4-11  | 2020-5-6   | 123.71214 | 45.66710 | 123.62941 | 45.84757 | 25            |
| SC9605  | 1996 | autumn | 1996-10-5  | 1996-10-29 | 122.96500 | 45.23200 | 123.02200 | 45.22000 | 24            |
| SC1902  | 2020 | autumn | 2020-10-11 | 2020-11-3  | 123.23425 | 42.68865 | 123.23117 | 42.68568 | 23            |
| SC9606  | 1996 | autumn | 1996-10-6  | 1996-10-28 | 124.51400 | 47.18900 | 124.48100 | 47.20200 | 23            |
| SC1504  | 2016 | spring | 2016-4-18  | 2016-5-8   | 123.31380 | 45.98430 | 122.87820 | 46.05870 | 20            |
| SC1902  | 2021 | autumn | 2021-10-6  | 2021-10-26 | 123.27705 | 45.94149 | 123.13635 | 46.04200 | 20            |
| SC1902  | 2021 | autumn | 2021-10-6  | 2021-10-26 | 123.27705 | 45.94149 | 123.13635 | 46.04200 | 20            |
| SC9509  | 1995 | autumn | 1995-10-18 | 1995-11-6  | 123.50500 | 45.04700 | 123.14600 | 45.21700 | 20            |
| SC1902  | 2021 | spring | 2021-4-20  | 2021-5-9   | 123.29879 | 45.99737 | 123.04089 | 46.17743 | 19            |
| SC9508  | 1995 | autumn | 1995-10-14 | 1995-10-31 | 122.84300 | 45.09600 | 122.14700 | 44.94300 | 17            |
| SC1901  | 2020 | autumn | 2020-10-23 | 2020-11-8  | 123.57124 | 45.73106 | 123.53436 | 45.76725 | 16            |
| SC9607  | 1996 | autumn | 1996-10-9  | 1996-10-24 | 123.42700 | 45.86300 | 123.43300 | 45.86300 | 15            |

**Supplementary Materials Table S4.** List of 18 stopover sites classified by birds staging for more than two days.

| BIRD_ID | Year | Season | Time1      | Time2      | Lon1      | Lat1     | Lon2      | Lat2     | Duration(Day) |
|---------|------|--------|------------|------------|-----------|----------|-----------|----------|---------------|
| SC1901  | 2020 | Autumn | 2020-11-8  | 2020-11-20 | 123.28710 | 42.72072 | 123.22527 | 42.68499 | 12            |
| SC1504  | 2016 | Autumn | 2016-10-5  | 2016-10-17 | 123.44060 | 45.92210 | 123.53110 | 45.86060 | 12            |
| SC1901  | 2020 | Autumn | 2020-10-12 | 2020-10-21 | 126.94856 | 51.10013 | 126.94681 | 51.06805 | 10            |
| SC9508  | 1995 | Autumn | 1995-11-2  | 1995-11-11 | 121.81000 | 40.92400 | 121.89400 | 40.78200 | 9             |
| SC9606  | 1996 | Autumn | 1996-11-6  | 1996-11-15 | 115.17600 | 32.35900 | 115.06800 | 32.29700 | 8             |
| SC9605  | 1996 | Autumn | 1996-9-20  | 1996-9-28  | 138.15400 | 65.36100 | 138.07700 | 65.24100 | 8             |
| SC1902  | 2020 | Autumn | 2020-9-24  | 2020-9-30  | 142.73094 | 68.08173 | 142.56676 | 68.02262 | 7             |
| SC1902  | 2020 | Spring | 2020-5-6   | 2020-5-12  | 124.46542 | 47.19865 | 124.46605 | 47.20219 | 6             |
| SC1504  | 2016 | Spring | 2016-5-20  | 2016-5-26  | 145.86120 | 69.34580 | 143.13100 | 68.64450 | 6             |
| SC1902  | 2020 | Autumn | 2020-10-5  | 2020-10-10 | 123.79869 | 45.19169 | 123.71075 | 44.96753 | 5             |
| SC1902  | 2021 | Autumn | 2021-9-27  | 2021-10-2  | 132.44748 | 59.25377 | 132.49587 | 59.24324 | 5             |
| SC1902  | 2021 | Autumn | 2021-9-27  | 2021-10-2  | 132.44670 | 59.25486 | 132.49587 | 59.24324 | 5             |
| SC1603  | 2016 | Autumn | 2016-9-7   | 2016-9-12  | 119.35155 | 47.70627 | 119.34534 | 47.70389 | 5             |
| SC1902  | 2020 | Spring | 2020-4-5   | 2020-4-10  | 123.20525 | 42.69786 | 123.23399 | 42.68814 | 4             |
| SC1902  | 2020 | Autumn | 2020-9-19  | 2020-9-23  | 143.20654 | 68.88331 | 143.06140 | 68.52586 | 4             |
| SC1902  | 2021 | Autumn | 2021-10-28 | 2021-11-1  | 119.06462 | 37.80771 | 119.28029 | 37.81202 | 4             |
| SC1902  | 2020 | Autumn | 2020-11-3  | 2020-11-7  | 119.00088 | 37.98628 | 118.99630 | 37.71066 | 3             |
| SC1504  | 2016 | Spring | 2016-5-11  | 2016-5-13  | 129.34590 | 54.60840 | 129.34610 | 54.60910 | 2             |

**Supplementary Materials Table S5.** Extent of tagged cranes used areas and conservation status

| Period                | Extent (km <sup>2</sup> ) | Protected               |            | Conservation gaps       |            |
|-----------------------|---------------------------|-------------------------|------------|-------------------------|------------|
|                       |                           | Area (km <sup>2</sup> ) | Percentage | Area (km <sup>2</sup> ) | Percentage |
| Breeding in Russia    | 801                       | 181                     | 22.57%     | 620                     | 77%        |
| Stopover              | 868                       | 391                     | 44.98%     | 478                     | 55%        |
| Summering in Mongolia | 246                       | 0                       | 0.00%      | 246                     | 100%       |
| Wintering             | 794                       | 395                     | 49.81%     | 398                     | 50%        |
